# Supplementary material for: The role of TAOK3 in cancer progression and development as a prognostic marker: A pan-cancer analysis study
Source: PubMed Central journal article supplement — Saudi Pharm J. 2023 Dec 28;32(3):101942. doi: 10.1016/j.jsps.2023.101942 (PMC10840358; doi:10.1016/j.jsps.2023.101942), 2023-12-28

**Supplementary Figure 1. TAOK3 expression levels were compared among main pathological stages (stage I, stage II, stage III, stage IV) of BRCA, KIRC, PAAC, and UCEC.**

Protein expression of TAOK3 in Breast cancer

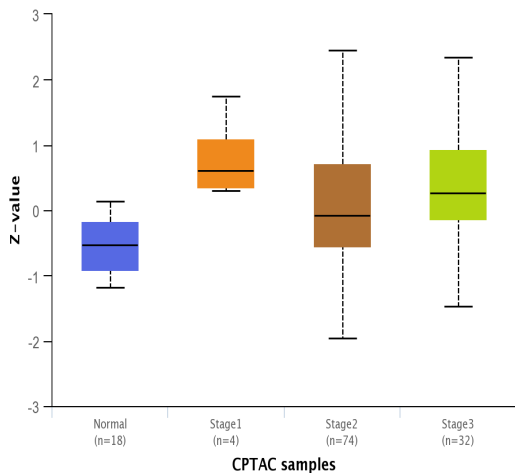

Protein expression of TAOK3 in Clear cell RCC

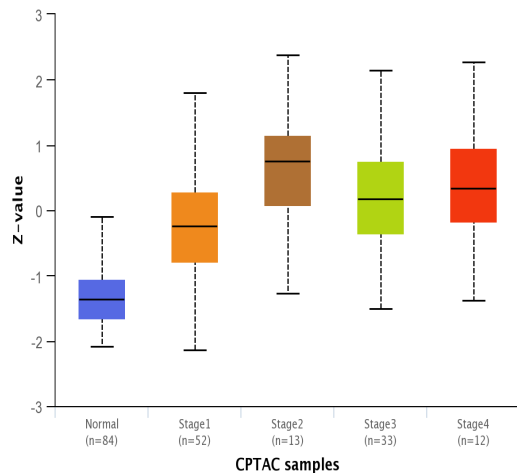

Protein expression of TAOK3 in Pancreatic adenocarcinoma

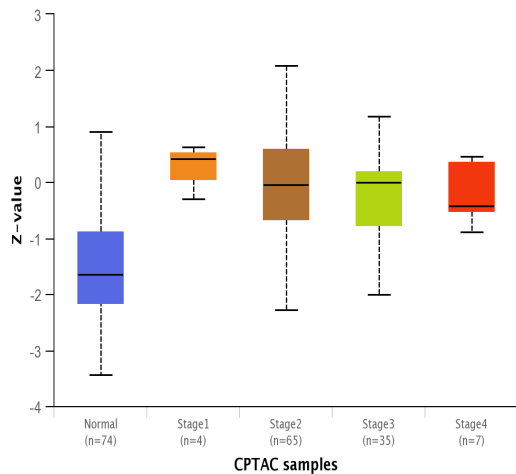

Protein expression of TAOK3 in UCEC

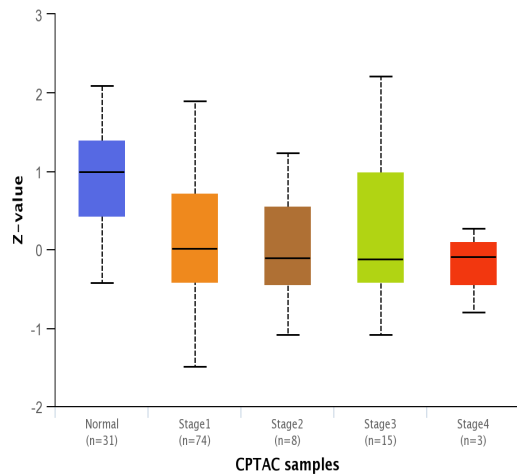

Supplement: mmc1.pdf [file mmc1.pdf]
