# Supplementary material for: The role of TAOK3 in cancer progression and development as a prognostic marker: A pan-cancer analysis study
Source: PubMed Central journal article supplement — Saudi Pharm J. 2023 Dec 28;32(3):101942. doi: 10.1016/j.jsps.2023.101942 (PMC10840358; doi:10.1016/j.jsps.2023.101942), 2023-12-28

**Supplementary Figure2. TAOK3 phosphorylation locus expression p- values in relation with Grades of KIRC**

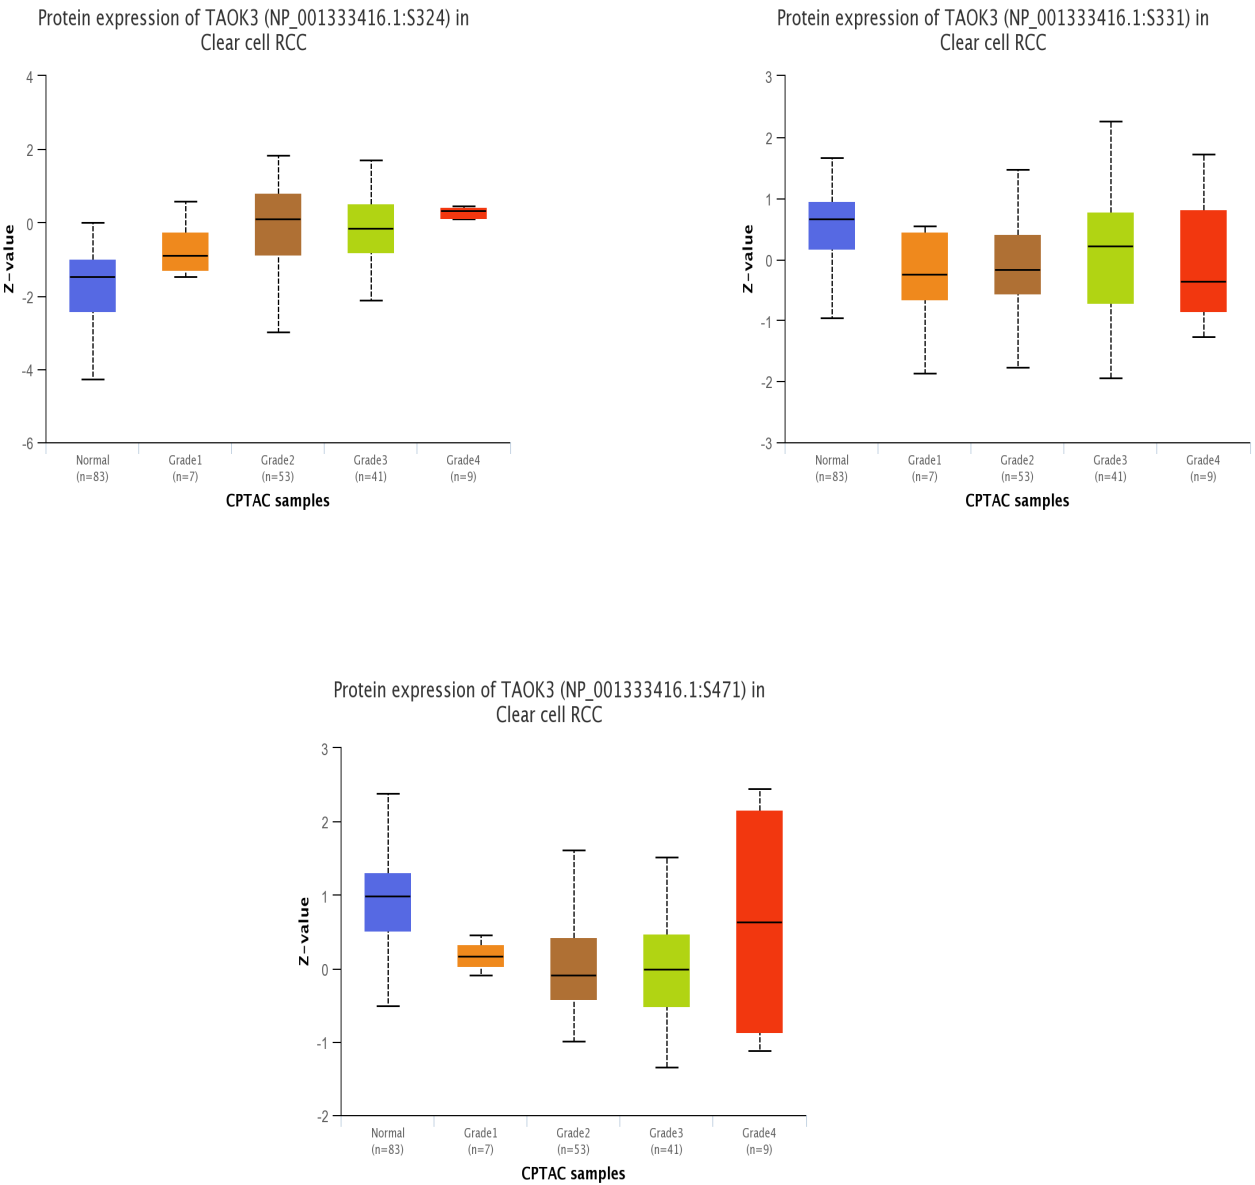

Supplement: mmc2.pdf [file mmc2.pdf]
